# Supplementary material for: Lychee-like TiO2@TiN dual-function composite material for lithium–sulfur batteries
Source: Royal Society of Chemistry journal article supplement (doi:10.1039/c9ra09534a), 2020-01-01
Supplement: c9ra09534a1.pdf [file c9ra09534a1.pdf]

## Supporting Information for

### Litchi-like $\text{TiO}_2@\text{TiN}$ dual-function composite material for lithium-sulfur

#### battery

Wei Xu<sup>a</sup>, Huimei Pang<sup>a</sup>, Heliang Zhou<sup>a</sup>, Zhixu Jian<sup>a</sup>, Riming Hu<sup>a</sup>, Yalan Xing<sup>a,\*</sup> and Shichao Zhang<sup>a,\*</sup>

<sup>a</sup> School of Materials Science and Engineering, Beihang University, Beijing 100191, PR China.

\* Corresponding Authors

E-mail addresses: csc@buaa.edu.cn (Shichao Zhang); xingyalan@buaa.edu.cn (Yalan Xing).

Tel: +8601082339319; fax: +8601082338148.

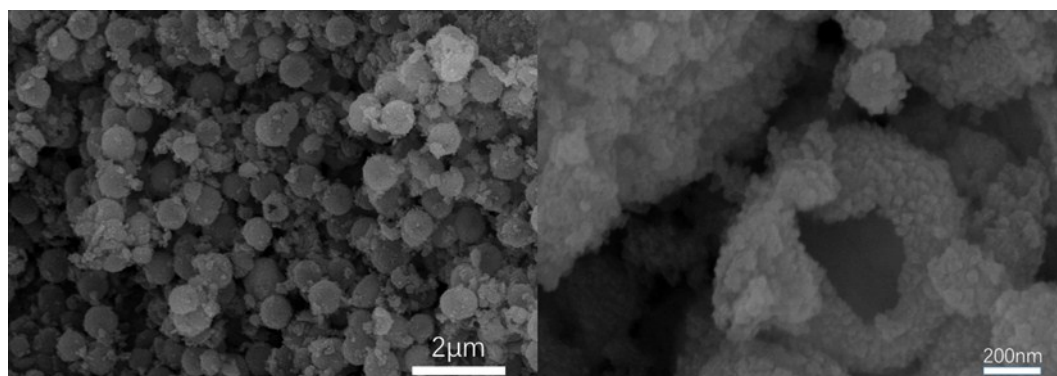

**Fig. S1** SEM images of broken LTTHS

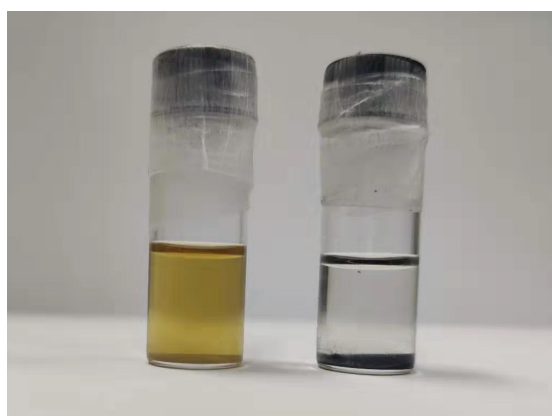

**Fig. S2** Static adsorption of  $\text{Li}_2\text{S}_6$  by LTTHS materials.

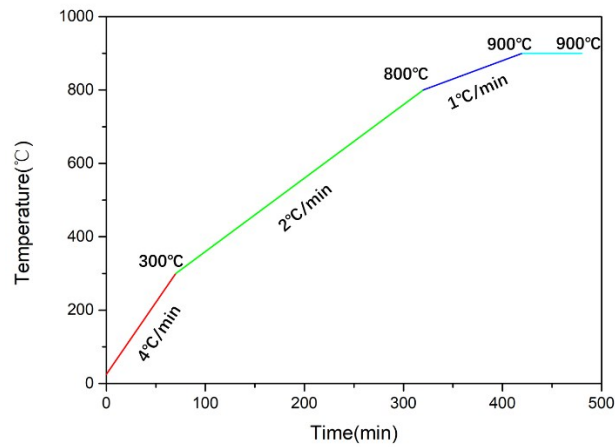

**Fig. S3** Heating rate

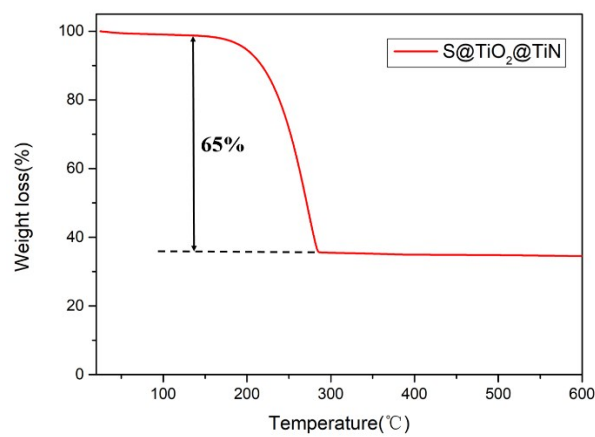

**Fig. S4** TGA curves of S@TiO<sub>2</sub>@TiN

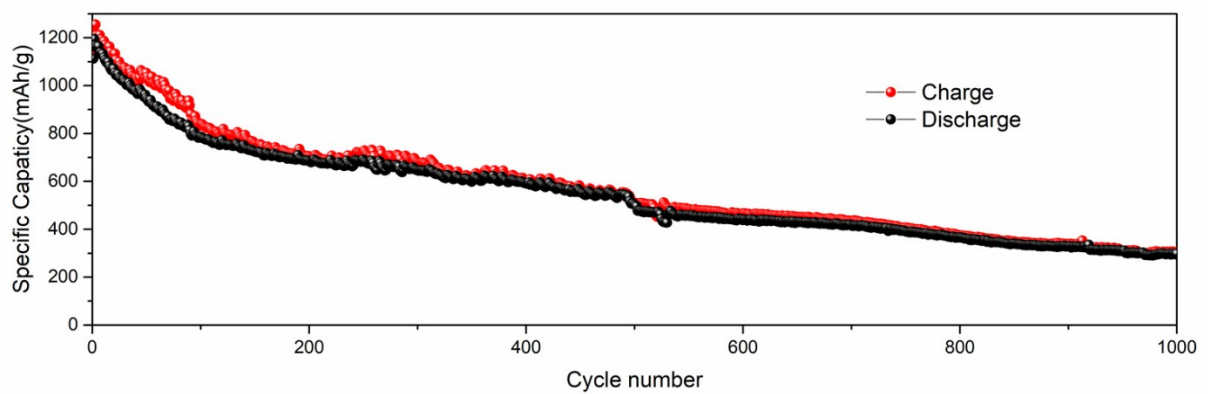

**Fig. S5** Cycle performance of LSTHS over 1000 cycles at 0.2 C.

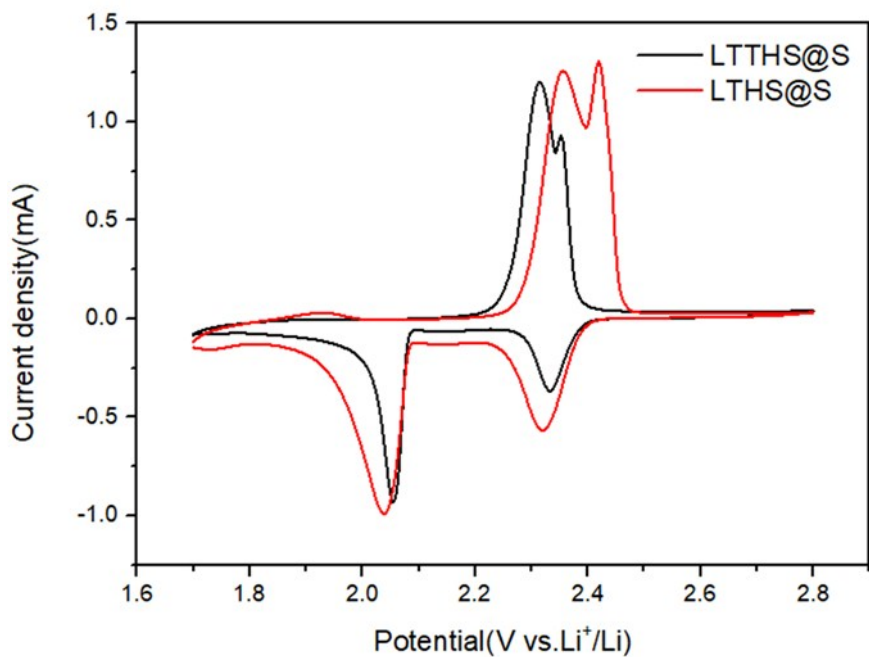

**Fig. S6** CV profiles of LTTHS@S and LTHS@S at a scan rate of  $0.1 \text{ mV s}^{-1}$ .

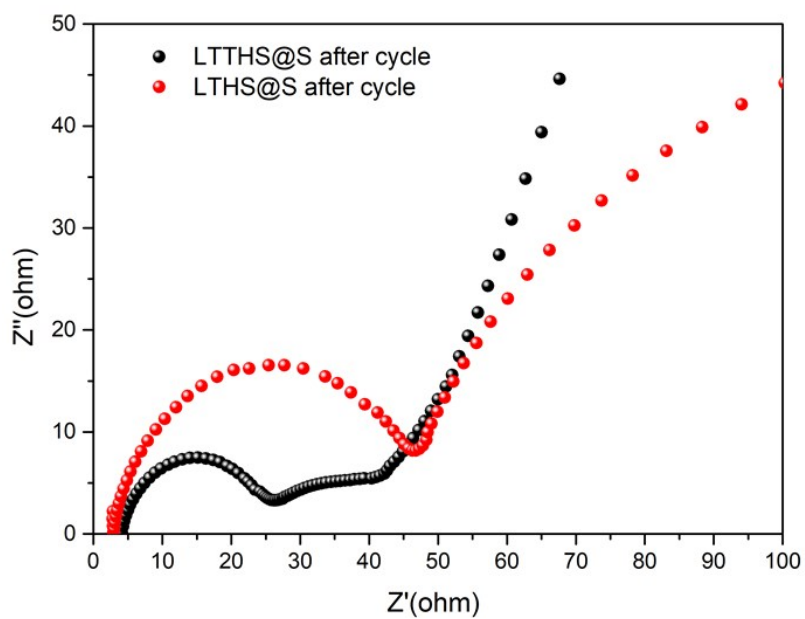

**Fig. S7** Electrochemical impedance spectra of LTTHS@S and LTHS@S after cycle.

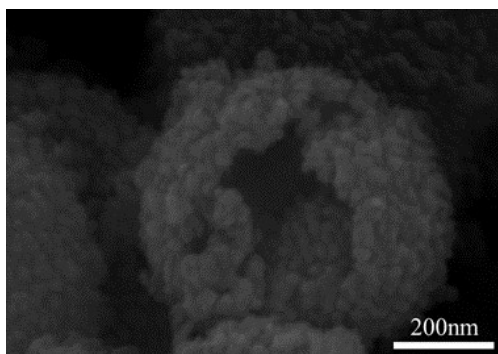

**Fig. S8** SEM images of the TiN sample

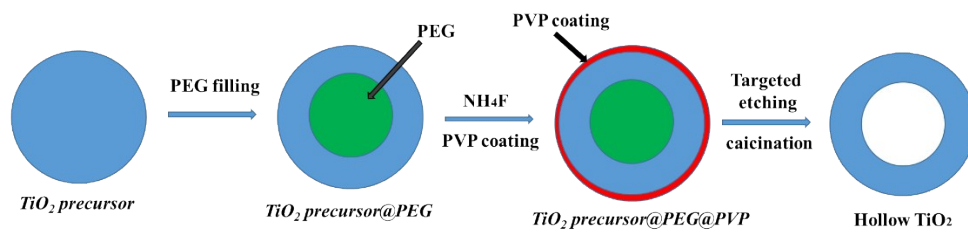

**Fig. S9** Schematic illustration of formation of hollow structures of TiO<sub>2</sub> spheres
